# Supplementary material for: Indium doped ZnO nanorods for chemiresistive NO2 gas sensors
Source: Royal Society of Chemistry journal article supplement (doi:10.1039/d2nj00114d), 2022-01-01
Supplement: d2nj00114d1.pdf [file d2nj00114d1.pdf]

## Indium Doped ZnO Nanorods for Chemiresistive NO<sub>2</sub> Gas Sensor

V. L. Patil<sup>a</sup>, D. S. Dalavi<sup>b</sup>, S. B. Dhavale<sup>a</sup>, S. A. Vanalakar<sup>c</sup>, N. L. Tarwal<sup>a</sup>, A. S. Kalekar<sup>d</sup>, J. H. Kim<sup>e</sup>, P. S. Patil<sup>a\*</sup>

<sup>a</sup>*Thin Film Materials Laboratory, Department of Physics, Shivaji University,  
Kolhapur- 416 004, India*

<sup>b</sup>*Department of Physics, Krishna Mahavidyalaya, Rethare Bk.*

<sup>c</sup>*Department of Physics, Karmaveer Hire Arts, Commerce, Science and Education College  
Gargoti, Dist: Kolhapur, 416 209, India*

<sup>d</sup>*Department of Physics, Institute of Chemical Technology, Mumbai-400019, India*

<sup>e</sup>*Department of Materials Science and Engineering, Chonnam National University,  
Gwangju, 500-757, South Korea*

### Supporting Information:

Fig. A) XPS spectrum of undoped ZnO and IZO-2 samples

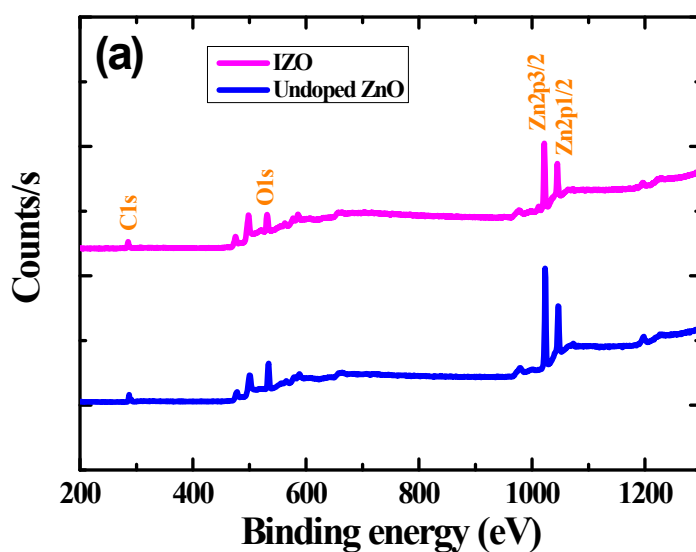

Fig. AS1) Full Spectrum of undoped ZnO and IZO-2

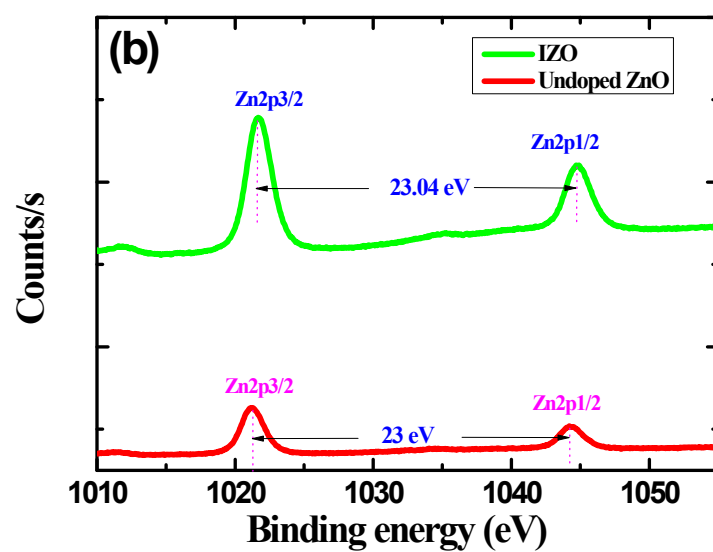

Fig. AS2) Zn Spectrum of undoped ZnO and IZO-2

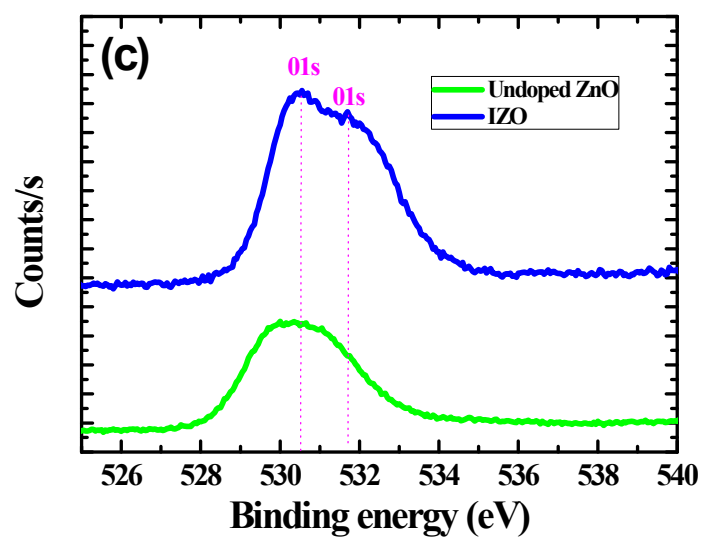

Fig. AS3) O spectrum of undoped ZnO and IZO-2

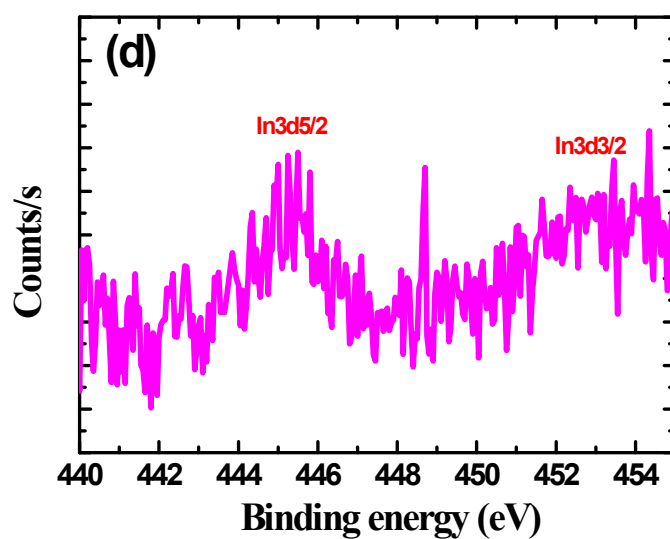

Fig. AS4) In spectrum of IZO-2

Fig. B) EDAX Spectra of undoped ZnO and IZO samples

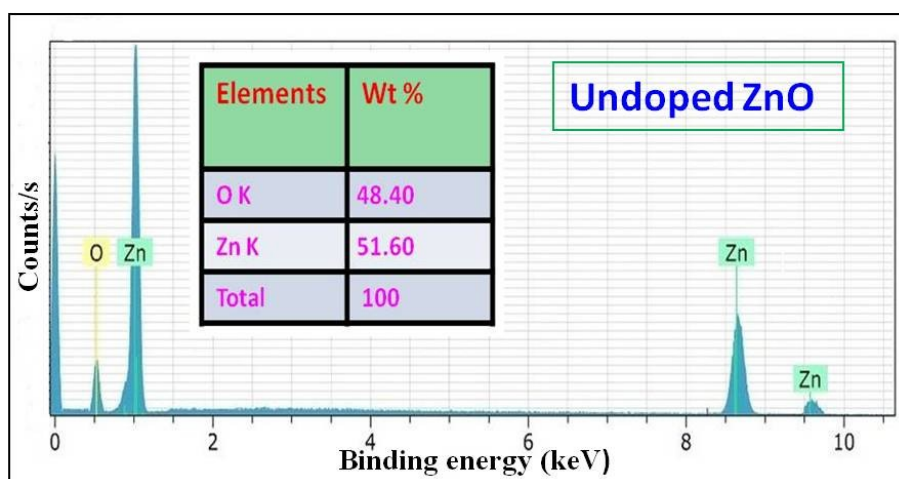

Fig. BS1) EDAX spectra of Undoped ZnO

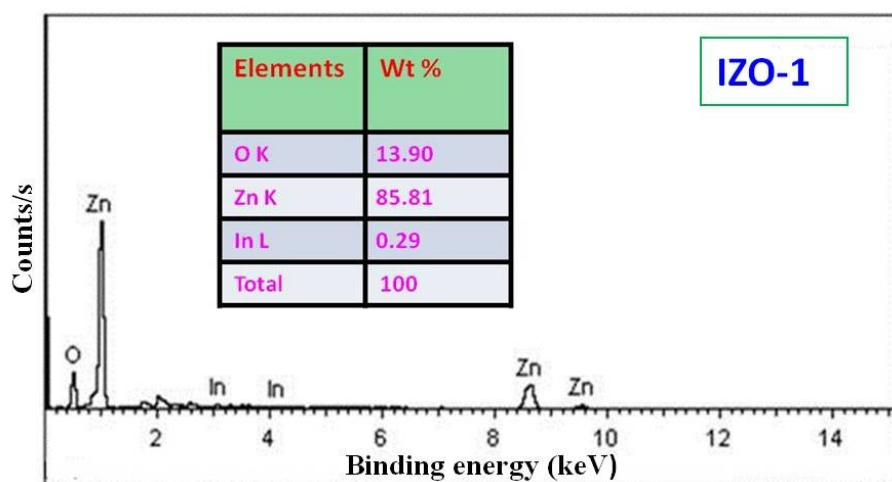

Fig. BS2) EDAX spectra of IZO-1

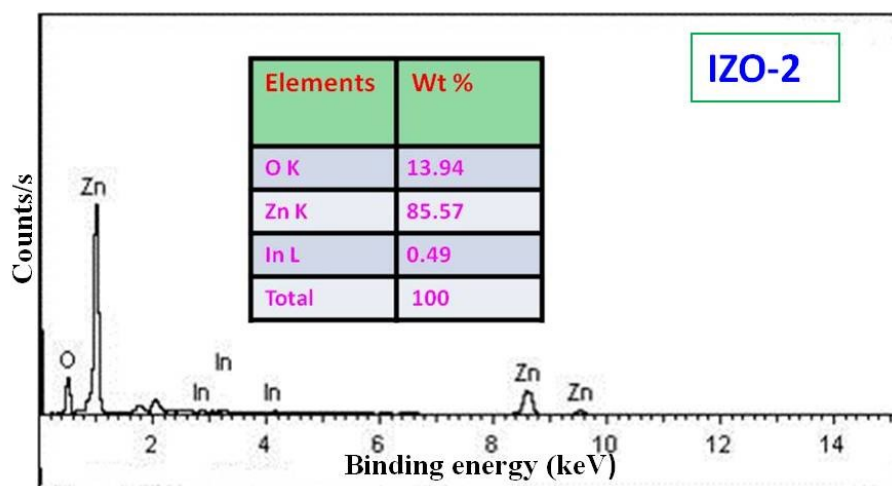

Fig. BS3) EDAX spectra of IZO-2

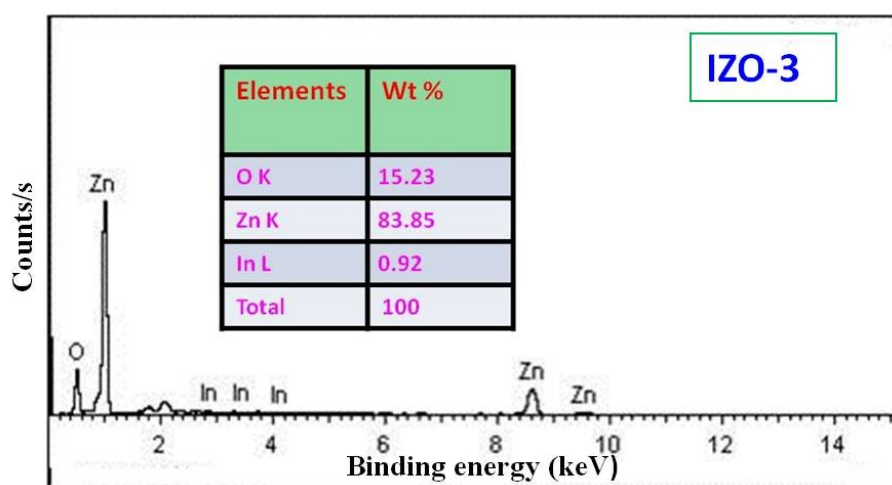

Fig. BS4) EDAX spectra of IZO-3

### **C) Activation Energy:**

The electrical characteristics of undoped ZnO and IZO samples were carried out by two probe resistivity measurements and analysis used to calculate the activation energy. The variation of electrical resistivity ( $\rho$ ) as a function of an inverse of temperature in the temperature range of 318-528 K was studied and shown in Fig. 8. The activation energy is the thermal energy required to transfer the charges (electrons or holes) from the valence to the conduction band of the semiconductor.
